# Supplementary material for: Particle Adsorption on Hydrogel Surfaces in Aqueous Media due to van der Waals Attraction
Source: Sci Rep. 2017 Jul 21;7:6099. doi: 10.1038/s41598-017-06257-1 (PMC5522479; doi:10.1038/s41598-017-06257-1)
Supplement: Supplementary file 1 — Supplementary Information [file 41598_2017_6257_MOESM1_ESM.pdf]

## Supplementary Information

### “Particle Adsorption on Hydrogel Surfaces in Aqueous Media due to van der Waals Attraction”

by Naoko SATO, Junpei YAMANAKA, Akiko TOYOTAMA, and Tohru OKUZONO

#### A. Interaction potential between charged particles and like-charged poly (acrylamide - acrylic acid) gel

We performed adsorption experiment of negatively charged polystyrene particles ( $a_p = 300$  nm,  $Z = 3256$ ) onto negatively charged poly (acrylamide - acrylic acid) [hereafter designated as P(AAm-AAc)] copolymer gel in water. P(AAm-AAc) gels were synthesized from acrylamide and acrylic acid monomers (molar ratio = 95 : 5).

The electrostatic interaction potential  $U_e(x)$  between a charged sphere and a flat surface separated by a distance  $x$  is given by

$$U_e(x) = a_p \varepsilon_m \psi_1 \psi_2 \log[1 + \exp(-\kappa x)]$$

Here,  $\psi_1$  and  $\psi_2$  are the electrostatic potentials on the particle and gel surfaces, respectively. The value of  $\psi_1$  was assume to be the same as the  $\zeta$  potential determined by electrophoresis (-50 mV).  $\psi_2$  was estimated based on Donnan equilibrium between the gel and outer phase ( $\psi_2 = \psi_s$  Fig.S1), given by

$$y_s + (\alpha - 1) \frac{2}{Q} \cosh y_s = \ln \left[ \sqrt{\left(\frac{Q}{2}\right)^2 + 1} + \frac{Q}{2} \right] - \frac{\sqrt{\left(\frac{Q}{2}\right)^2 + 1} - \alpha}{\frac{Q}{2}}$$

Here  $y_s = -(e_0 \psi_s)/(k_B T)$ ,  $Q = q/n_i$ , and  $\alpha = (\varepsilon_o n_o)/(\varepsilon_i n_i)$  [ $e_0$ , the elementary charge;  $q$ , number density of the fixed charge in gel;  $n_i$  and  $n_o$ , ion concentrations inside and outside the gel;  $\varepsilon_i$  and  $\varepsilon_o$ , permittivity of the gel and of medium, respectively].  $q$  value was calculated from dissociation constant of AAc monomer. The total interaction potential  $U = U_e + U_{vdW}$  calculated at various values of [NaCl] (5–50 mM) is shown in Fig.S2. The potential curves had secondary minima, which became deeper on increasing [NaCl]s. The depth of the potential is  $1 k_B T$  at  $x \sim 10$  nm, at [NaCl] = 50 mM. Figure S3 shows the area fraction  $\phi$  of adsorbed particles plotted against [NaCl]. The  $\phi$  value increased on increasing [NaCl], as expected from the potential curves.

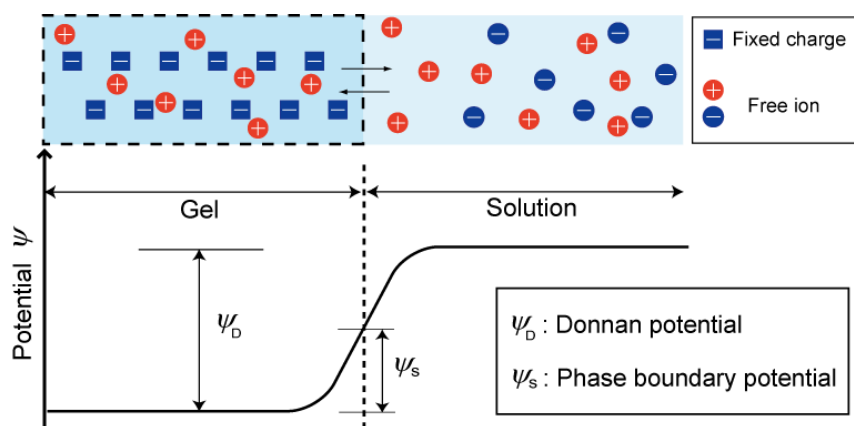

**Figure S1** An illustration of Donnan potential and surface potential of charged gel.

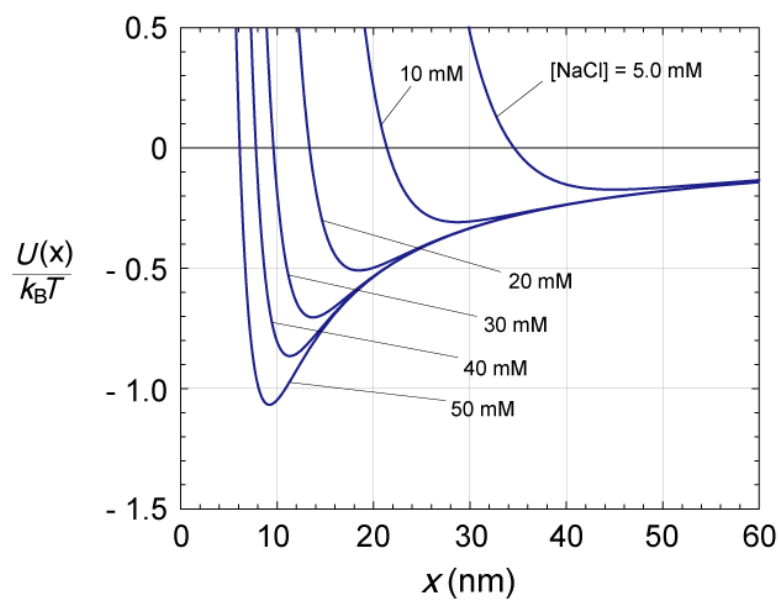

**Figure S2** Influence of  $[NaCl]$  on the interaction potential  $U(x)$  between the charged particle and like charged gel.

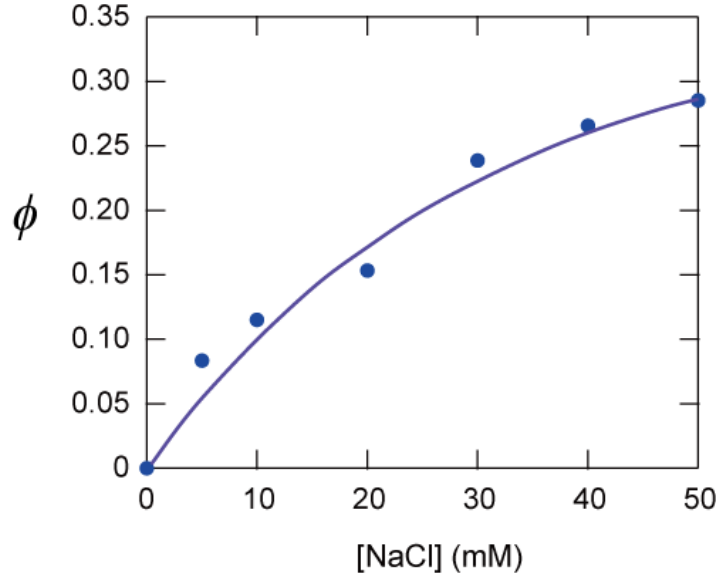

**Figure S3**  $\phi$  vs. [NaCl] plot for the P(AAm-AAc) gel.

#### B. Equilibrium sizes of PAAm-based gel and PDMA gel at various values of $C_{EG}$ .

Figure S4 shows diameters of disk shaped PAAm-based gel [taken from reference 29] and PDMA gel in equilibrium swelling at various values of  $C_{EG}$  (reduced by the diameter in pure water,  $d_w$ ). The sample size did not significantly vary on changing  $C_{EG}$  for both gel samples.

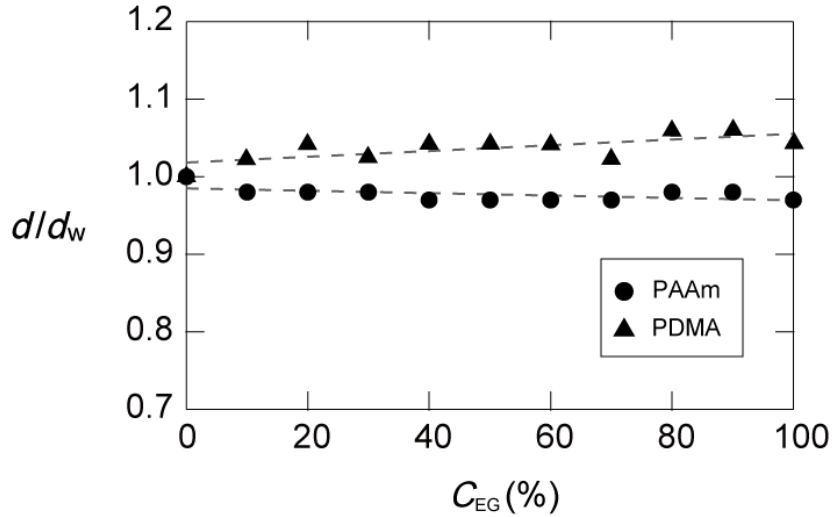

**Figure S4** Equilibrium swelling ratios for two kinds of gels at various values of  $C_{EG}$ .

### C. Estimation of some parameters in adhesion contact theories

Figure S5 shows the Maugis parameter  $\lambda$  vs  $C_{EG}$  plot for three values of  $\delta$  (sample: PAAm gel,  $E_2 = 6.3\text{kPa}$ ). In Figure S6,  $a_0$  and  $d_0$  calculated based on JKR, DMT, and MD theories are presented. Figure S7 presents  $U_{de}$  at three values of  $\delta$  and  $U_{el}$ ,  $U_a$ , and  $U_{de} = U_{el} + U_a$  at  $\delta = 2\text{nm}$ , plotted against  $C_{EG}$ .

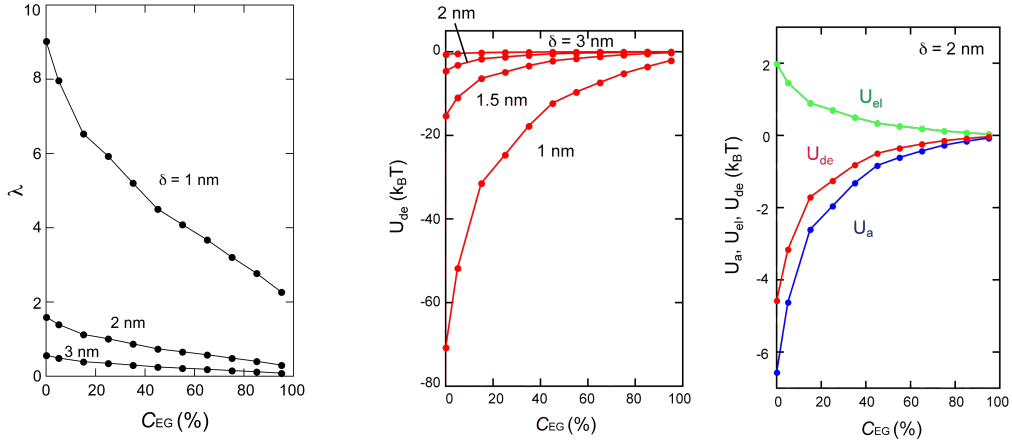

**Figure S5**  $\lambda$  vs  $C_{EG}$  plot for three values of  $\delta$ .

**Figure S7** (left)  $U_{de} = U_{el} + U_a$  at three values of  $\delta$ . (right)  $U_{de}$ ,  $U_{el}$ , and  $U_a$  plotted against  $C_{EG}$ .

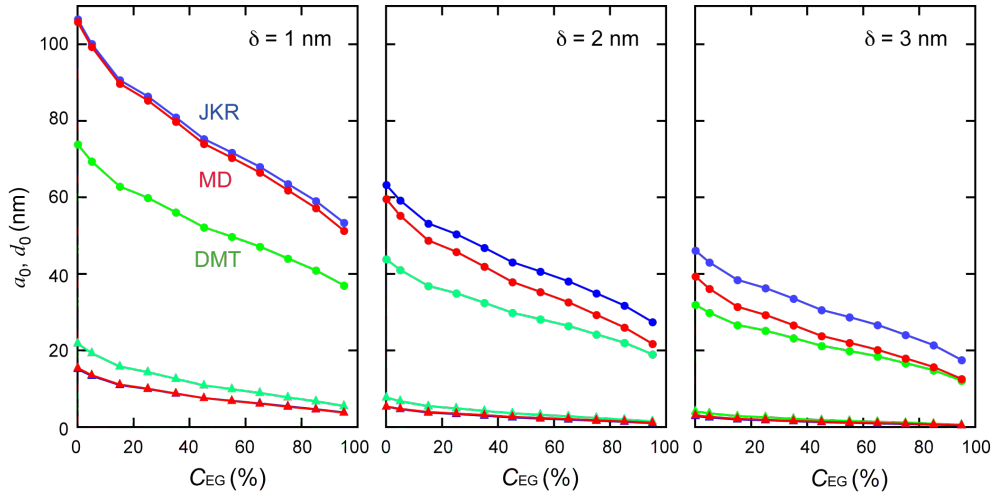

**Figure S6**  $a_0$  (circles) and  $d_0$  (triangles) calculated based on JKR, MD, and DMT theories plotted against  $C_{EG}$  for three values of  $\delta$ .
